# Supplementary material
Source: PubMed Central journal article supplement (PMC3430541)
Supplement: supp_112.142448_TableS1.pdf [file supp_112.142448_TableS1.pdf]

Table S1: Estimated 5% genome-wide significance thresholds, based on 10,000 simulation replicates, for a single intercross. We assumed an autosomal genome modeled after the mouse, with genetic markers at a 10 cM spacing.

| sample size | threshold |
|-------------|-----------|
| 50          | 3.80      |
| 75          | 3.72      |
| 100         | 3.65      |
